# Supplementary material for: Telemedicine platform for health assessment remotely by an integrated nanoarchitectonics FePS3/rGO and Ti3C2-based wearable device
Source: PubMed Central journal article supplement (PMC9376913; doi:10.1038/s41528-022-00208-1), 2022-08-15
Supplement: 41528_2022_208_MOESM1_ESM.pdf [file 41528_2022_208_MOESM1_ESM.pdf]

# Supplementary Information

## Telemedicine Platform for Health Assessment Remotely by an Integrated Nanoarchitectonics FePS<sub>3</sub>/rGO and Ti<sub>3</sub>C<sub>2</sub>-based Wearable Device

Jayraj V. Vaghasiya<sup>1</sup>, Carmen C. Mayorga-Martinez<sup>1</sup>, Martin Pumera<sup>1,2,3,4\*</sup>

<sup>1</sup>Center for Advanced Functional Nanorobots, Department of Inorganic Chemistry, Faculty of Chemical Technology, University of Chemistry and Technology Prague, Technická 5, 166 28 Prague, Czech Republic

<sup>2</sup>Energy Research Institute@NTU (ERI@N), Research Techno Plaza, X-Frontier Block, Level 5, 50 Nanyang Drive, 637553 Singapore, Singapore

<sup>3</sup>Faculty of Electrical Engineering and Computer Science, VSB - Technical University of Ostrava, 17. listopadu 2172/15, 70800 Ostrava, Czech Republic

<sup>4</sup>Department of Medical Research, China Medical, University Hospital, China Medical University, No. 91 Hsueh-Shih Road, Taichung 40402, Taiwan

E-mail: [pumera.research@gmail.com](mailto:pumera.research@gmail.com)

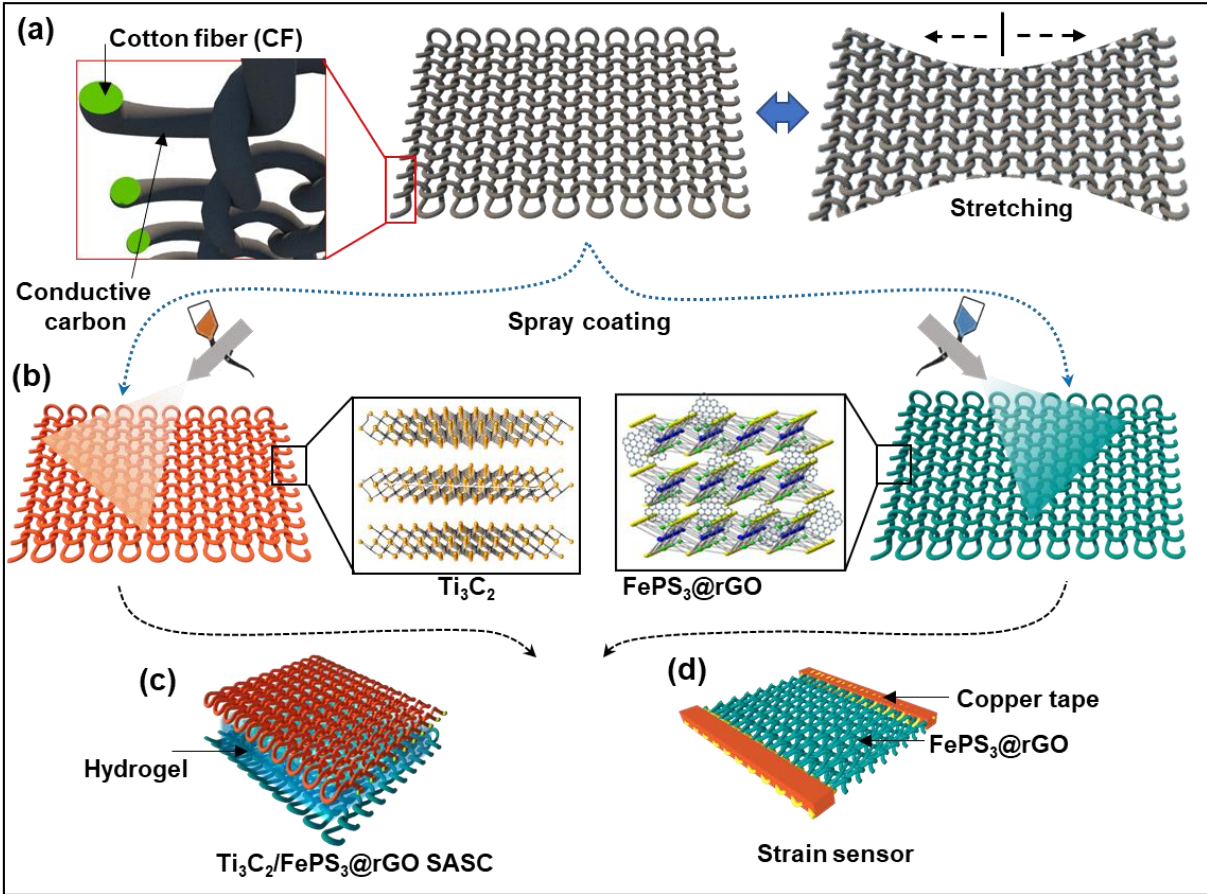

**Supplementary Figure 1.** A fabrication process of  $\text{Ti}_3\text{C}_2/\text{FePS}_3@r\text{GO}$  SASC: **(a)** Schematic depiction of the conducting cotton fabric (CF) in normal and stretch mode, **(b)** spray-coating of  $\text{FePS}_3@r\text{GO}$  and  $\text{Ti}_3\text{C}_2$  on fabric, **(c, d)** architecture of the  $\text{Ti}_3\text{C}_2/\text{FePS}_3@r\text{GO}$  SASC and  $\text{FePS}_3@r\text{GO}$  based strain sensor, respectively.

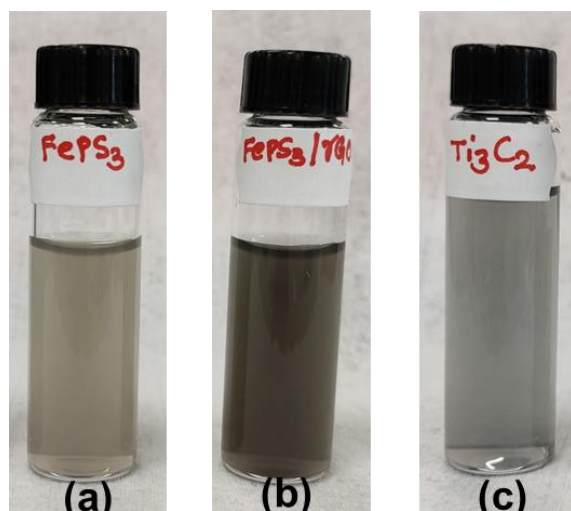

**Supplementary Figure 2.** Colloidal solution of (a)  $\text{FePS}_3$ , (b)  $\text{FePS}_3@r\text{GO}$ , and (c)  $\text{Ti}_3\text{C}_2$ .

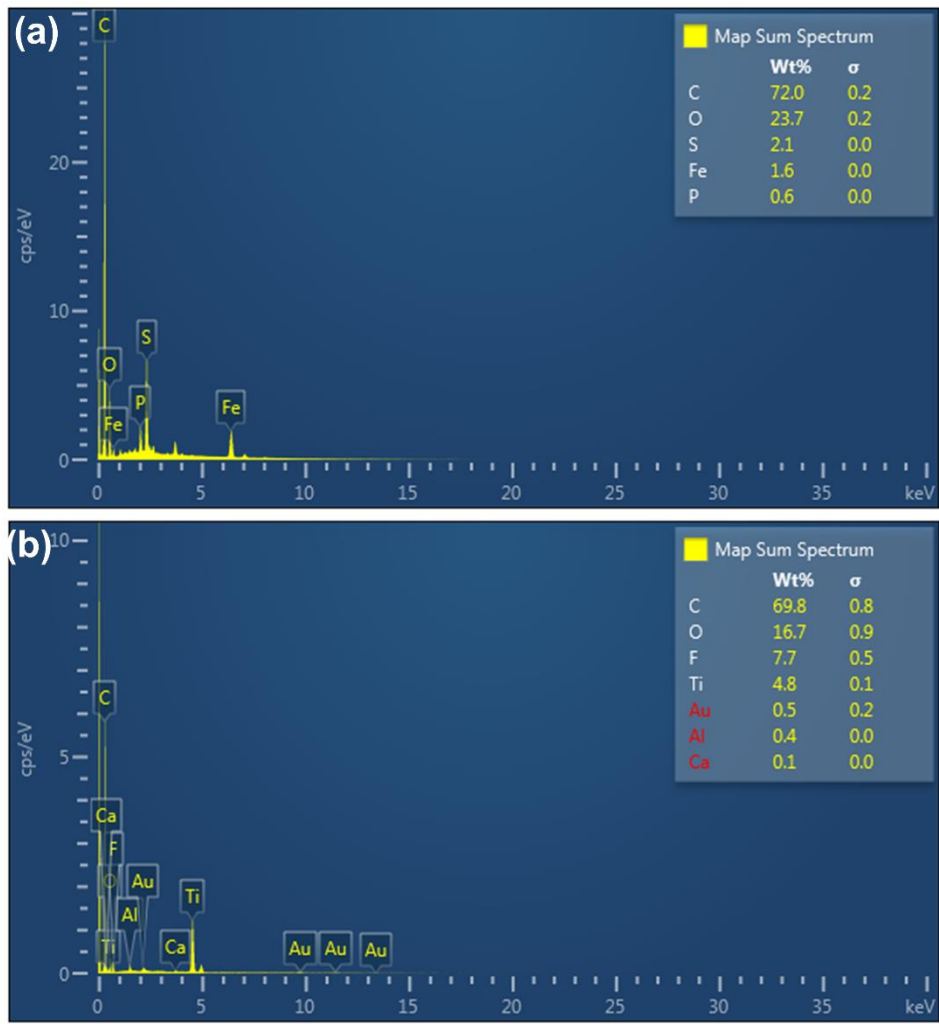

**Supplementary Figure 3.** EDS spectra of FePS<sub>3</sub>@rGO (a) and Ti<sub>3</sub>C<sub>2</sub> (b) coated fabrics.

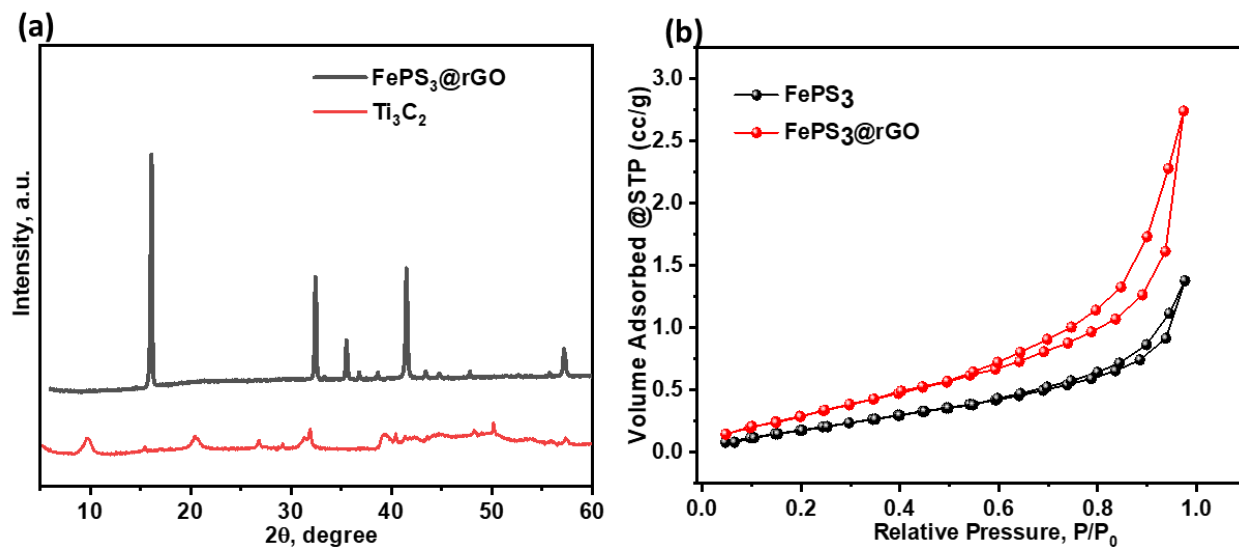

**Supplementary Figure 4.** (a) XRD pattern of FePS<sub>3</sub> and Ti<sub>3</sub>C<sub>2</sub>, and (b) nitrogen adsorption-desorption isotherm of pristine FePS<sub>3</sub> and FePS<sub>3</sub>@rGO.

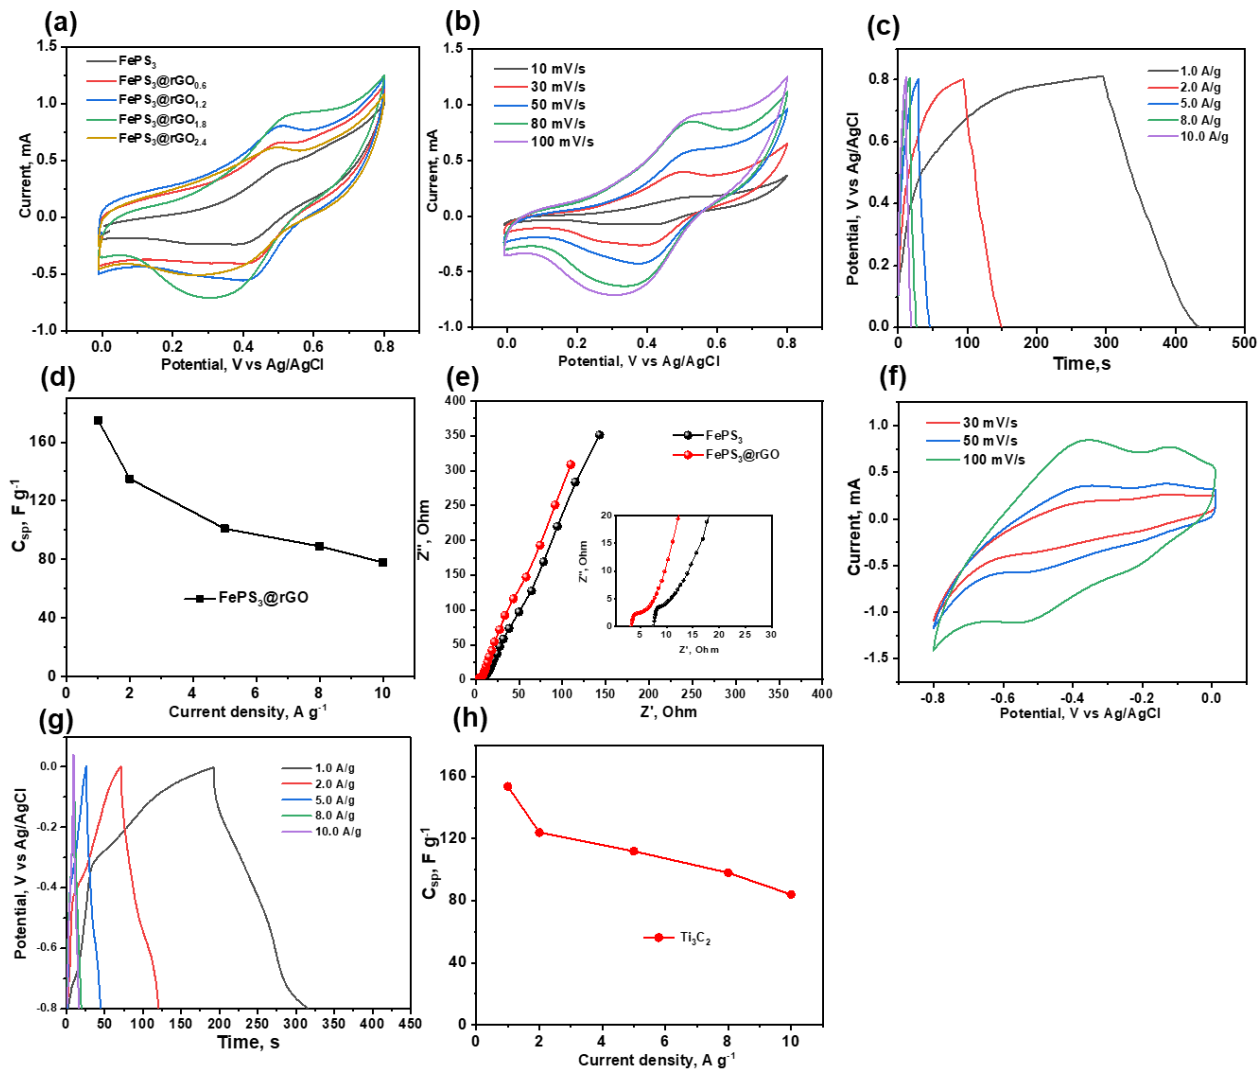

**Supplementary Figure 5.** Electrochemical performance in the three-electrode system; **(a)** CV curves of pristine FePS<sub>3</sub> and different amounts of rGO in FePS<sub>3</sub> electrodes at a scan rate of 50 mV/s; **(b)** CV curves of FePS<sub>3</sub>@rGO<sub>1.8</sub> at different scan rates; **(c)** GCD plots of FePS<sub>3</sub>@rGO<sub>1.8</sub> as a function of current densities; **(d)** C<sub>sp</sub> versus current densities of FePS<sub>3</sub>@rGO<sub>1.8</sub> electrode; **(e)** Nyquist plots of pristine FePS<sub>3</sub> and FePS<sub>3</sub>@rGO<sub>1.8</sub> electrodes (inset shows a magnification of high-frequency region); **(f)** CV curves of Ti<sub>3</sub>C<sub>2</sub> at different scan rates; **(g)** GCD plots of Ti<sub>3</sub>C<sub>2</sub> as a function of current densities; **(h)** C<sub>sp</sub> versus current densities of Ti<sub>3</sub>C<sub>2</sub> electrode.

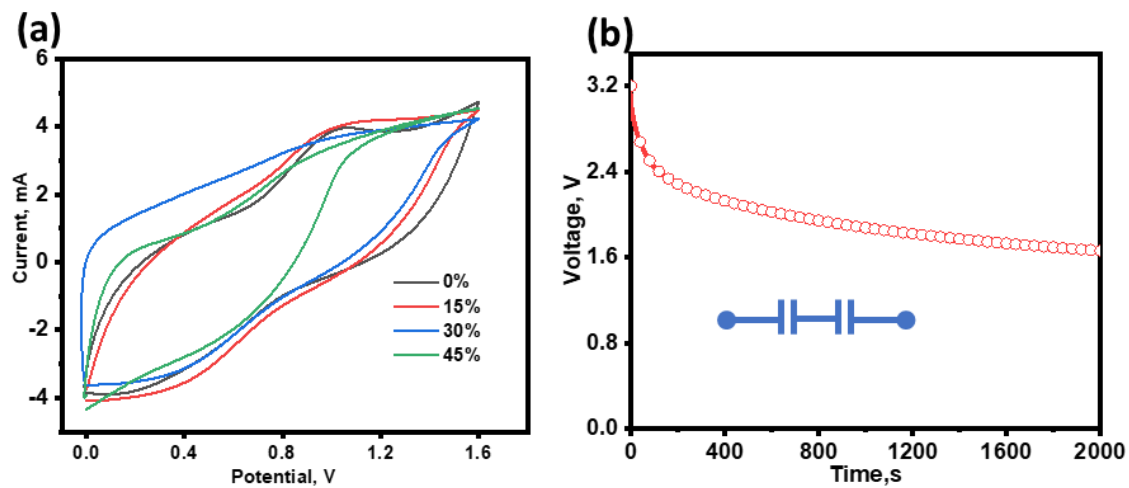

**Supplementary Figure 6.** (a) CV curves measured at a scan rate of  $50 \text{ mV s}^{-1}$  under different tensile strains; (b) self-discharge curve of two serially connected SASC.

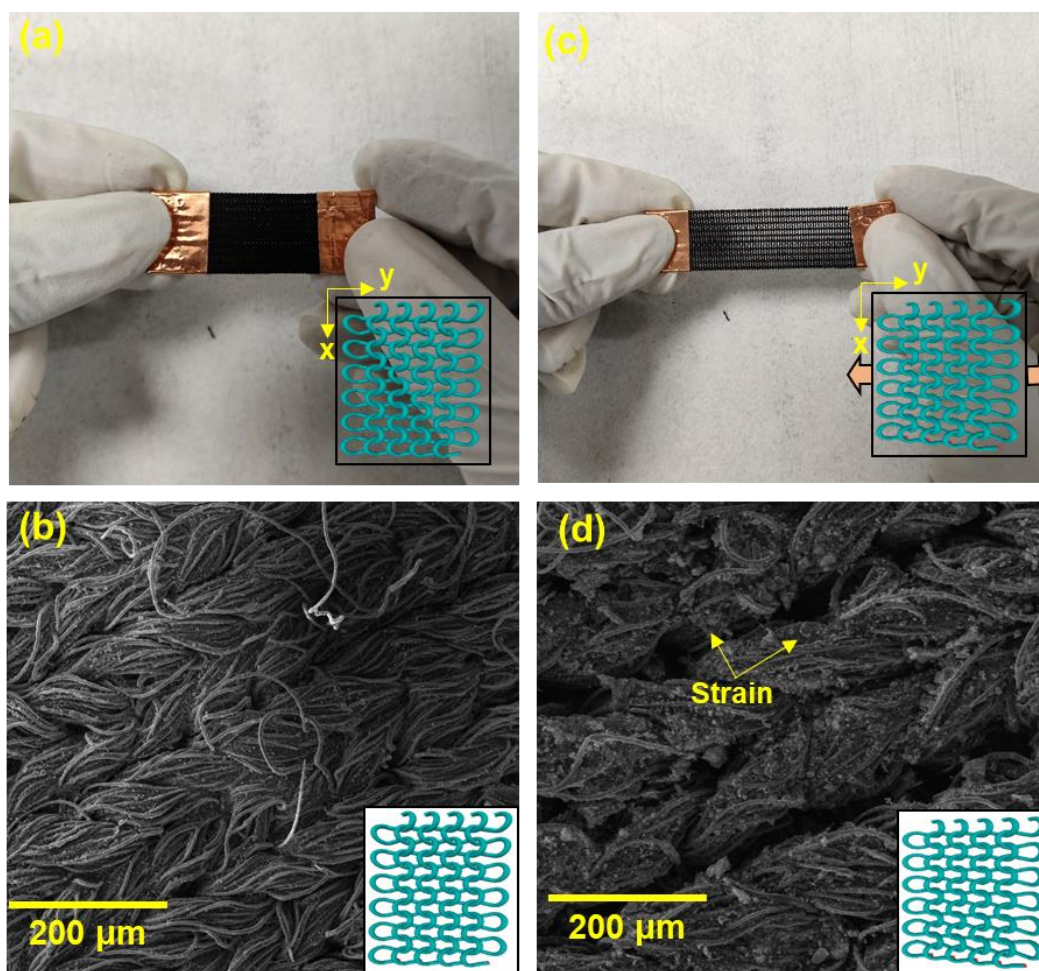

**Supplementary Figure 7.** (a, b) Digital photograph and loop architecture of FePS<sub>3</sub>@rGO strain sensor without strain and corresponding SEM image. (c, d) Digital photograph and loop architecture of FePS<sub>3</sub>@rGO strain sensor stretched in the y-direction and corresponding SEM image.



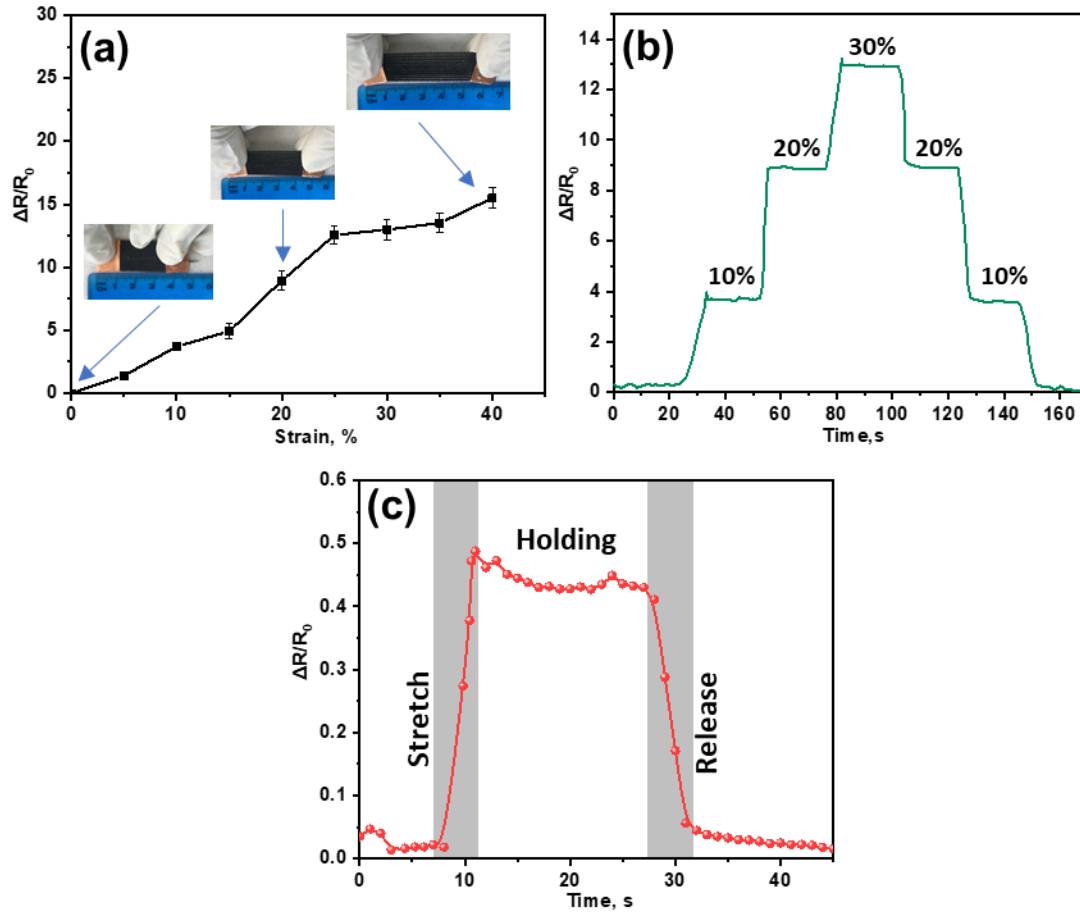

**Supplementary Figure 8.** (a) Relative resistance versus strain response curves of FePS<sub>3</sub>@rGO strain sensor; (b) repetitive measurements of the variation in the relative resistance as a function of a strain of 10, 20 and 30%; (c) response curve with an applied strain of 1%.

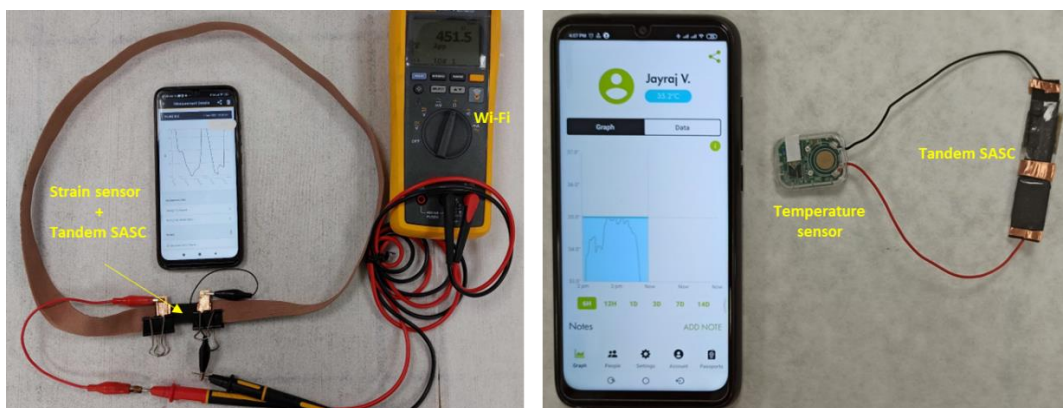

**Supplementary Figure 9.** Digital photograph of an integrated  $\text{FePS}_3@r\text{GO}$  strain sensor (left side image) and temperature sensor (right side image) with series-connected  $\text{Ti}_3\text{C}_2/\text{FePS}_3$  SASC and wirelessly relay data to a mobile phone.

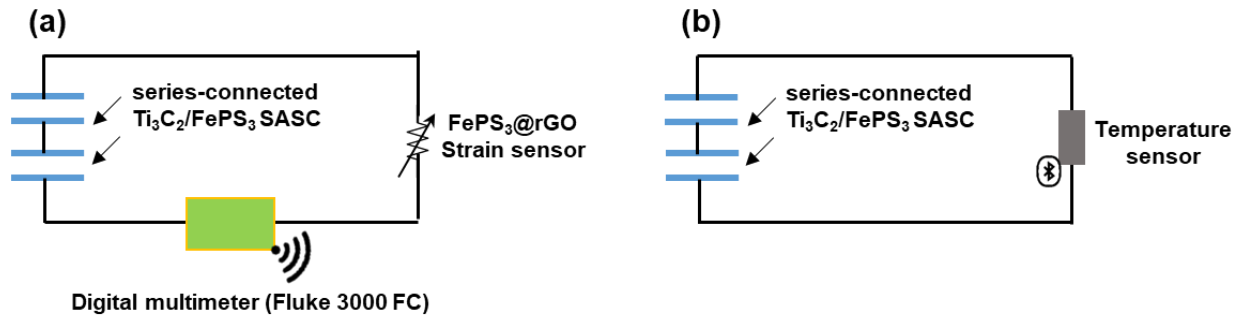

**Supplementary Figure 10.** The schematic illustration of the electric circuit of the integrated strain sensor (a) and temperature sensor (b).

**Supplementary Table 1.** The gravimetric capacitance, energy density and power density of reported supercapacitors. (NA: not available)

| Electrode                                               | Electrolyte                         | $C_{sp}$ , F/g                   | E, Wh kg <sup>-1</sup> | P, W kg <sup>-1</sup> | Ref.      |
|---------------------------------------------------------|-------------------------------------|----------------------------------|------------------------|-----------------------|-----------|
| rGO                                                     | H <sub>3</sub> PO <sub>4</sub> /PVA | 56.11 (at 5 mV s <sup>-1</sup> ) | 1.95                   | 159.8                 | 1         |
| rGO-PEDOT/PSS                                           | H <sub>3</sub> PO <sub>4</sub> /PVA | 132 (at 5 mV s <sup>-1</sup> )   | 2.83                   | 3589                  | 1         |
| co-doped GO aerogels                                    | H <sub>2</sub> SO <sub>4</sub> /PVA | 62 (at 5 mV s <sup>-1</sup> )    | 8.65                   | 1600                  | 2         |
| NiPS <sub>3</sub>                                       | 3 M KOH                             | 61.3 (at 1.0 A g <sup>-1</sup> ) | 19.2                   | 750                   | 3         |
| Ti <sub>3</sub> C <sub>2</sub> T <sub>x</sub> //rGO     | Organic                             | 48 (NA)                          | 8                      | NA                    | 4         |
| Ti <sub>3</sub> C <sub>2</sub> T <sub>x</sub> /MWCNT    | Organic                             | 7 (NA)                           | 3                      | NA                    | 4         |
| MnO <sub>2</sub> /Ti <sub>3</sub> CT <sub>x</sub> -ar   | KOH                                 | 210 (at 0.1 A g <sup>-1</sup> )  | 5.47                   | 700                   | 5         |
| Ti <sub>3</sub> CT <sub>x</sub> _Ar                     | KOH                                 | 35 (at 0.1 A g <sup>-1</sup> )   | 2.19                   | 700                   | 5         |
| rGO                                                     | Ionic liquid                        | 80.4 (at 0.1 A g <sup>-1</sup> ) | 11.2                   | NA                    | 6         |
| LT-Ti <sub>3</sub> C <sub>2</sub> T <sub>x</sub>        | 3M KCl                              | 467 (at 5 A g <sup>-1</sup> )    | 5.67                   | 589                   | 7         |
| AC//Go@WO <sub>3</sub>                                  | H <sub>2</sub> SO <sub>4</sub> /PVA | 465 (at 1 A g <sup>-1</sup> )    | 27                     | 6000                  | 8         |
| AC//rGO/NiSe <sub>2</sub>                               | 3M KOH                              | 114 (at 1 A g <sup>-1</sup> )    | 41                     | 842                   | 9         |
| HRG//m-WO <sub>3</sub>                                  | 1 M H <sub>2</sub> SO <sub>4</sub>  | 389 (at 0.5 A g <sup>-1</sup> )  | 93                     | 500                   | 10        |
| Ti <sub>3</sub> C <sub>2</sub> //FePS <sub>3</sub> @rGO | F108@LiBF <sub>4</sub>              | 62.9 (at 1.0 A g <sup>-1</sup> ) | 5.59                   | 400                   | This work |
| Ti <sub>3</sub> C <sub>2</sub> //FePS <sub>3</sub> @rGO | F108@LiBF <sub>4</sub>              | 62.9 (at 1.0 A g <sup>-1</sup> ) | 2.1                    | 2000                  |           |

**Supplementary Movie 1.** Shows the resistivity as a function of stretch. The FePS<sub>3</sub>@rGO-based strain sensor is connected in a closed circuit with a red LED.

**Supplementary Movie 2.** Remotely monitoring breathing cycles. An integrated FePS<sub>3</sub>@rGO-based strain sensor and SASC fixing on the volunteer's abdomen.

## Supplementary References

1. Liu, Y. et al. High-Performance flexible all-solid-state supercapacitor from large free-standing graphene-PEDOT/PSS films. *Sci. Rep.*, **5**, 17045 (2015).
2. Wu, Z. S. et al. Three-dimensional nitrogen and boron Co-doped graphene for high-performance all-solid-state supercapacitors. *Adv. Mater.*, **24**, 5130-5135 (2012).
3. Asif, A. H. et al. Heterogeneous activation of peroxymonosulfate by Co-doped Fe<sub>2</sub>O<sub>3</sub> nanospheres for degradation of p-hydroxybenzoic acid. *J. Colloid Interface Sci.* **616**, 401-402 (2022).
4. Navarro-Suárez, A. M. et al. Development of asymmetric supercapacitors with titanium carbide-reduced graphene oxide couples as electrodes. *Electrochim. Acta* **259**, 752-761 (2018).
5. Rakhi, R. B., Ahmed, B., Anjum, D. & Alshareef, H. N. Direct chemical synthesis of MnO<sub>2</sub> nanowhiskers on transition-metal carbide surfaces for supercapacitor applications. *ACS Appl. Mater. Interfaces* **8**, 18806-18814 (2016).
6. Rath, T. & Kundu, P. P. Reduced graphene oxide paper based nanocomposite materials for flexible supercapacitors. *RSC Adv.*, **5**, 26666-26674 (2015).
7. Pan, X., Shinde, N. M., Lee, M., Kim, D., Kim, K. H. & Kang, M. Controlled nanosheet morphology of titanium carbide Ti<sub>3</sub>C<sub>2</sub>T<sub>x</sub> MXene via drying methods and its electrochemical analysis. *J. Solid State Electrochem.* **24**, 675-686 (2020).
8. Nayak, A. K., Das, A. K. & Pradhan, D. High performance solid-state asymmetric supercapacitor using green synthesized graphene-WO<sub>3</sub> nanowires nanocomposite. *ACS Sustainable Chem. Eng.* **5**, 10128–10138 (2017).
9. Gu, Y. et al. N-doped reduced graphene oxide decorated NiSe<sub>2</sub> nanoparticles for high-performance asymmetric supercapacitors. *J. Power Sources* **425**, 60-68 (2019).
10. Ashraf, M. et al. A High-Performance asymmetric supercapacitor based on tungsten oxide nanoplates and highly reduced graphene oxide electrodes. *Chem. Eur. J.* **27**, 6973-6984 (2021).
